# Supplementary material for: A Machine Learning Approach Unveils the Relationships between Sickness Behavior and Interoception after Vaccination: Suggestions for Psychometric Indices of Higher Vulnerability
Source: MDPI journal article supplement (doi:10.3390/healthcare11222981), 2023-11-18
Supplement: s1 [file s1]

## **Supplementary Material**

1. Table S1: first section of the online survey.
2. Table S2: trait characteristics.
3. Supplementary File S1
4. Table S3: confusion matrix referring to the first preliminary round.
5. Table S4: common classifiers referring to the first preliminary round.
6. Table S5: confusion matrix referring to the second round.
7. Table S6: common classifiers referring to the second round.
8. Table S7: confusion matrix referring to the last round.
9. Figure S1: SicknessQ Boxplots.

**Table S1. First section of the online survey**

| Questions                                                                                                                                                                                                          | Possible answers                                                                                                                                                                                                                  |
|--------------------------------------------------------------------------------------------------------------------------------------------------------------------------------------------------------------------|-----------------------------------------------------------------------------------------------------------------------------------------------------------------------------------------------------------------------------------|
| Sex                                                                                                                                                                                                                | <ul style="list-style-type: none"> <li>· Male</li> <li>· Female</li> <li>· Other</li> </ul>                                                                                                                                       |
| Age                                                                                                                                                                                                                | Free answer                                                                                                                                                                                                                       |
| Marital Status                                                                                                                                                                                                     | <ul style="list-style-type: none"> <li>· Unmarried/maiden</li> <li>· Married</li> <li>· Separated</li> <li>· Widower</li> <li>· Other</li> </ul>                                                                                  |
| Level of education                                                                                                                                                                                                 | <ul style="list-style-type: none"> <li>· Primary school</li> <li>· Secondary school</li> <li>· High school</li> <li>· Bachelor's degree</li> <li>· Master's degree</li> <li>· PhD</li> <li>· Other</li> </ul>                     |
| What is your profession? (If you have difficulty identifying your sector, consult this site: <a href="https://www.atlantedelleprofessioni.it/professioni">https://www.atlantedelleprofessioni.it/professioni</a> ) | Free answer                                                                                                                                                                                                                       |
| Do you usually practice physical activity?                                                                                                                                                                         | <ul style="list-style-type: none"> <li>· No</li> <li>· Yes, less than once a week</li> <li>· Yes, once or twice a week</li> <li>· Yes, three or more times a week</li> <li>· Other</li> </ul>                                     |
| If you do physical activity, can you tell us what kind of activity?                                                                                                                                                | <ul style="list-style-type: none"> <li>· None</li> <li>· Fitness</li> <li>· Running</li> <li>· Swimming</li> <li>· Walk</li> <li>· Football</li> <li>· Other</li> </ul>                                                           |
| Have you ever been affected by COVID-19?                                                                                                                                                                           | <ul style="list-style-type: none"> <li>· I've never been positive about Covid</li> <li>· I am currently positive for Covid</li> <li>· I had Covid but I am no longer positive (swab result: negative)</li> <li>· Other</li> </ul> |
| Has the doctor ever diagnosed you with major diseases? (If yes, please specify)                                                                                                                                    | Free answer                                                                                                                                                                                                                       |
| Were you in an immunocompromised situation during vaccination (e. g. immunosuppressive therapy, immunodeficient disease)?                                                                                          | <ul style="list-style-type: none"> <li>· Yes</li> <li>· Not</li> </ul>                                                                                                                                                            |
| Did you experience any side effects from the vaccination?                                                                                                                                                          | <ul style="list-style-type: none"> <li>· Yes</li> <li>· Not</li> </ul>                                                                                                                                                            |
| Questions                                                                                                                                                                                                          | Possible answers                                                                                                                                                                                                                  |

|                                                                                  |                                                                                                                                                                                                                                                                                                                                                                                                                                                                                                                                                                                                                                                                                                   |
|----------------------------------------------------------------------------------|---------------------------------------------------------------------------------------------------------------------------------------------------------------------------------------------------------------------------------------------------------------------------------------------------------------------------------------------------------------------------------------------------------------------------------------------------------------------------------------------------------------------------------------------------------------------------------------------------------------------------------------------------------------------------------------------------|
| If so, which ones?                                                               | <ul style="list-style-type: none"> <li>· No reaction</li> <li>· Tenderness, pain, warmth, itching or bruising where the injection is given</li> <li>· Feeling tired (fatigue) or generally feeling unwell</li> <li>· Chills or a feeling of fever</li> <li>· Headache</li> <li>· Feeling sick (nausea)</li> <li>· Joint pain or muscle pain</li> <li>· Swelling or redness where the injection is given</li> <li>· Fever (<math>&gt; 38^{\circ}\text{C}</math>)</li> <li>· Malaise (vomiting or diarrhea)</li> <li>· Drowsiness or feelings of dizziness</li> <li>· Decreased appetite</li> <li>· Enlarged lymph nodes</li> <li>· Excessive sweating, itching or rash</li> <li>· Other</li> </ul> |
| How worried were you about possible adverse reactions?                           | The answer uses a ten-point Likert scale ranging from 1–10 (from “not at all” to “very much”)                                                                                                                                                                                                                                                                                                                                                                                                                                                                                                                                                                                                     |
| Did you hear about adverse vaccine reactions prior to vaccination?               | <ul style="list-style-type: none"> <li>· No</li> <li>· Yes, from the TV</li> <li>· Yes, from social media</li> <li>· Yes, from friends or relatives</li> <li>· Yes, from colleagues</li> <li>· Yes, I had talked to my doctor about it</li> <li>· Other</li> </ul>                                                                                                                                                                                                                                                                                                                                                                                                                                |
| If you answered “Yes” to any of the above options, did you take any precautions? | <ul style="list-style-type: none"> <li>· Yes</li> <li>· Not</li> </ul>                                                                                                                                                                                                                                                                                                                                                                                                                                                                                                                                                                                                                            |
| If so, what precautions?                                                         | Free answer                                                                                                                                                                                                                                                                                                                                                                                                                                                                                                                                                                                                                                                                                       |

| <b>Table S2: trait characteristics</b> |        |                     |
|----------------------------------------|--------|---------------------|
| <b>MAIA components</b>                 | Median | Interquartile Range |
| <b>Noticing</b>                        | 2.25   | [1.00 – 3.00]       |
| <b>Not-Distracting</b>                 | 2.33   | [1.66 – 3.00]       |
| <b>Not-Worrying</b>                    | 3.00   | [2.33 – 3.66]       |
| <b>Attention Regulation</b>            | 2.42   | [1.60 – 3.28]       |
| <b>Emotional Awareness</b>             | 2.80   | [1.00 – 3.60]       |
| <b>Self-Regulation</b>                 | 1.80   | [1.00 – 2.60]       |
| <b>Body Listening</b>                  | 2.00   | [1.00 – 3.00]       |
| <b>Trusting</b>                        | 3.00   | [2.00 – 4.00]       |
| <b>Concern about adverse reaction</b>  | 4.00   | [2.00 – 6.00]       |

## Supplementary File S1

### Classification accuracy between L-SB and H-SB groups based on all variables, including SicknessQ, at the baseline

The baseline variables exhibiting optimal efficiency in classifying the participant within the L-SB and H-SB groups have been identified through JRIP rule (Cohen, 1995 [18]) and its cut-offs. JRIP yielded an accuracy of **76.20 %**, as shown in the decision matrix (**Table S3**) and the rules (n. 6) were the following:

- 1) *If SicknessQ Total Score T0 is  $\geq 3$ , then the subject is classified as H-SB;*
- 2) *If SicknessQ Total Score T0 is  $\geq 1$  and MAIA Emotional Awareness is  $\geq 3.6$ , then the subject is classified as H-SB;*
- 3) *If Systemic Symptoms = Positive and Sex = Female and Age  $\leq 53$  and MAIA Noticing  $\geq 1.25$  and MAIA Not-Worrying  $\geq 3$ , then the subject is classified as H-SB;*
- 4) *If Systemic Symptoms = Positive and PSQI Subjective quality of sleep T0  $\geq 1$  and Concerns about adverse reactions  $\geq 6$  and PSQI Sleep Latency T0  $\geq 1$ , then the subject is classified as H-SB;*
- 5) *If Fever ( $> 38^{\circ} \text{C}$ ) = Positive and Local symptoms = Positive and Concerns about adverse reactions  $\geq 4$  and MAIA Attention Regulation  $\leq 2.714286$ , then the subject is classified as H-SB;*
- 6) *If the previous five roles are not applicable, then the individual is classified as a L-SB subject.*

The reported set of decision rules results in high accuracy in classifying High-SB (176/227; accuracy=78%) and Low-SB (189/252; accuracy=75%) groups, AUC= 0.710 (d= 0.782) and F1=0.76.

Besides *JRIP*, the classification has been performed also by five other common classifiers: Naïve Bayes, Logistic Regression, Simple Logistic, Support Vector Machine, Random Forest. Their classification accuracy was estimated using k-fold cross validation technique (k=10) yielding performance similar to JRIP (**Table S4**).

In particular, the most accurate classifier in classifying individuals with low SB (209/252) and high SB (174/227) (83% and 77%, respectively) was the Support Vector Machine (SVM) with an overall accuracy of **79.96%**, AUC =0.729 (d=0.862). However, compared to JRIP the other classifiers did not allow identifying variables exhibiting optimal classification efficiency.

**Table S3. Confusion matrix referring to the first preliminary round.**

|      | L-SB (Group A)<br>(n=252) | H-SB (Group B)<br>(n=227) | Accuracy for corrected<br>classification |
|------|---------------------------|---------------------------|------------------------------------------|
| L-SB | 189                       | 63                        | 75%                                      |
| H-SB | 51                        | 176                       | 78%                                      |

Confusion matrix showing the clearer performing set of decision rules (n=6) with JRIP using 10-fold cross-validation (AUC=0.710, d=0.782; F1=0.76)

**Table S4. Common classifiers referring to the first preliminary round.**

| Classifier             | Accuracy (%) | AUC                | F1   | Correct classification       |
|------------------------|--------------|--------------------|------|------------------------------|
| Naïve Bayes            | 77.04        | 0.835<br>(d=1.378) | 0.76 | L-SB: 229/252; H-SB: 140/227 |
| Logistic Regression    | 77.04        | 0.827<br>(d=1.333) | 0.77 | L-SB: 198/252; H-SB: 171/227 |
| Simple Logistic        | 78.50        | 0.833<br>(d=1.366) | 0.78 | L-SB: 211/252; H-SB: 165/227 |
| Support Vector Machine | 79.96        | 0.729<br>(d=0.862) | 0.80 | L-SB: 209/252; H-SB: 174/227 |
| Random Forest          | 79.54        | 0.848<br>(d=1.454) | 0.80 | L-SB: 209/252; H-SB: 172/227 |

The correct classification achieved by the different classifiers measured by accuracy, AUC, F1.

**Table S5. Confusion matrix referring to the second round**

|      | L-SB<br>(Group A)<br>(n=252) | H-SB<br>Group B)<br>(n=227) | Accuracy for corrected<br>classification |
|------|------------------------------|-----------------------------|------------------------------------------|
| L-SB | 171                          | 81                          | 68%                                      |
| H-SB | 50                           | 177                         | 78%                                      |

Confusion matrix showing the clearer performing set of decision rules (n=8) with JRIP using 10-fold cross-validation (AUC=0.692, d=0.709; F1=0.726)

**Table S6: Common classifiers referring to the second round.**

| Classifier             | Accuracy (%) | AUC             | F1   | Correct classification       |
|------------------------|--------------|-----------------|------|------------------------------|
| Naïve Bayes            | 75.16        | 0.817 (d=1.278) | 0.75 | L-SB: 222/252; H-SB: 138/227 |
| Logistic Regression    | 75.99        | 0.794 (d=1.160) | 0.76 | L-SB: 197/252; H-SB: 167/227 |
| Simple Logistic        | 78.08        | 0.819 (d=1.289) | 0.78 | L-SB:199/252; H-SB: 175/227  |
| Support Vector Machine | 77.04        | 0.706 (d=0.766) | 0.77 | L-SB: 195/252; H-SB: 174/227 |
| Random Forest          | 77.24        | 0.822 (d=1.305) | 0.77 | L-SB:197/252; H-SB: 173/227  |

The correct classification achieved by different classifiers measured by accuracy, AUC, F1

**Table S7: Confusion matrix referring to the last round.**

|      | L-SB<br>(Group A)<br>(n=252) | H-SB<br>(Group B)<br>(n=227) | Accuracy for corrected<br>classification |
|------|------------------------------|------------------------------|------------------------------------------|
| L-SB | 181                          | 71                           | 72%                                      |
| H-SB | 47                           | 180                          | 79%                                      |

Confusion matrix based on the JRIP set of decision rules, using 10-fold cross-validation. (AUC= 0.694; d=0.717; F1= 0.754)

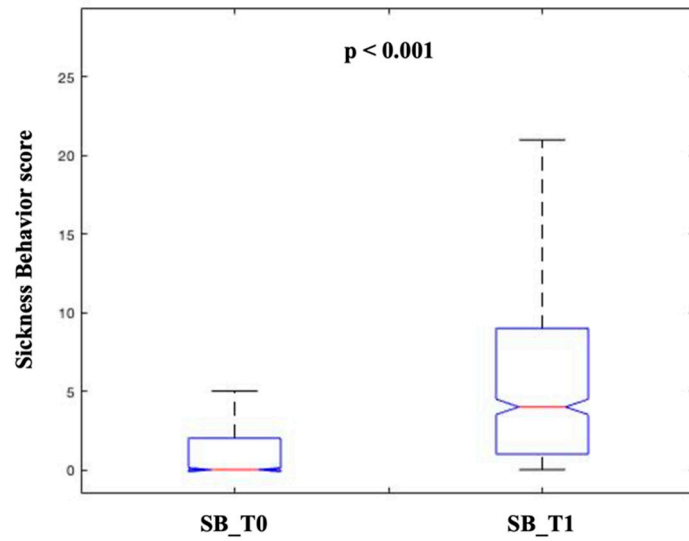

**Figure S1.** Boxplots show the increase in SB levels before (SB\_T0) and after (SB\_T1) vaccine inoculation. Boxes represent the first and third quartiles, and horizontal lines within boxes represent median values. Whiskers represent non-outlier high and low values.
